# Supplementary material
Source: ML conference proceedings conference paper supplement (https://proceedings.neurips.cc/paper_files/paper/2020/hash/da21bae82c02d1e2b8168d57cd3fbab7-Abstract.html)

# Design Sensitivity

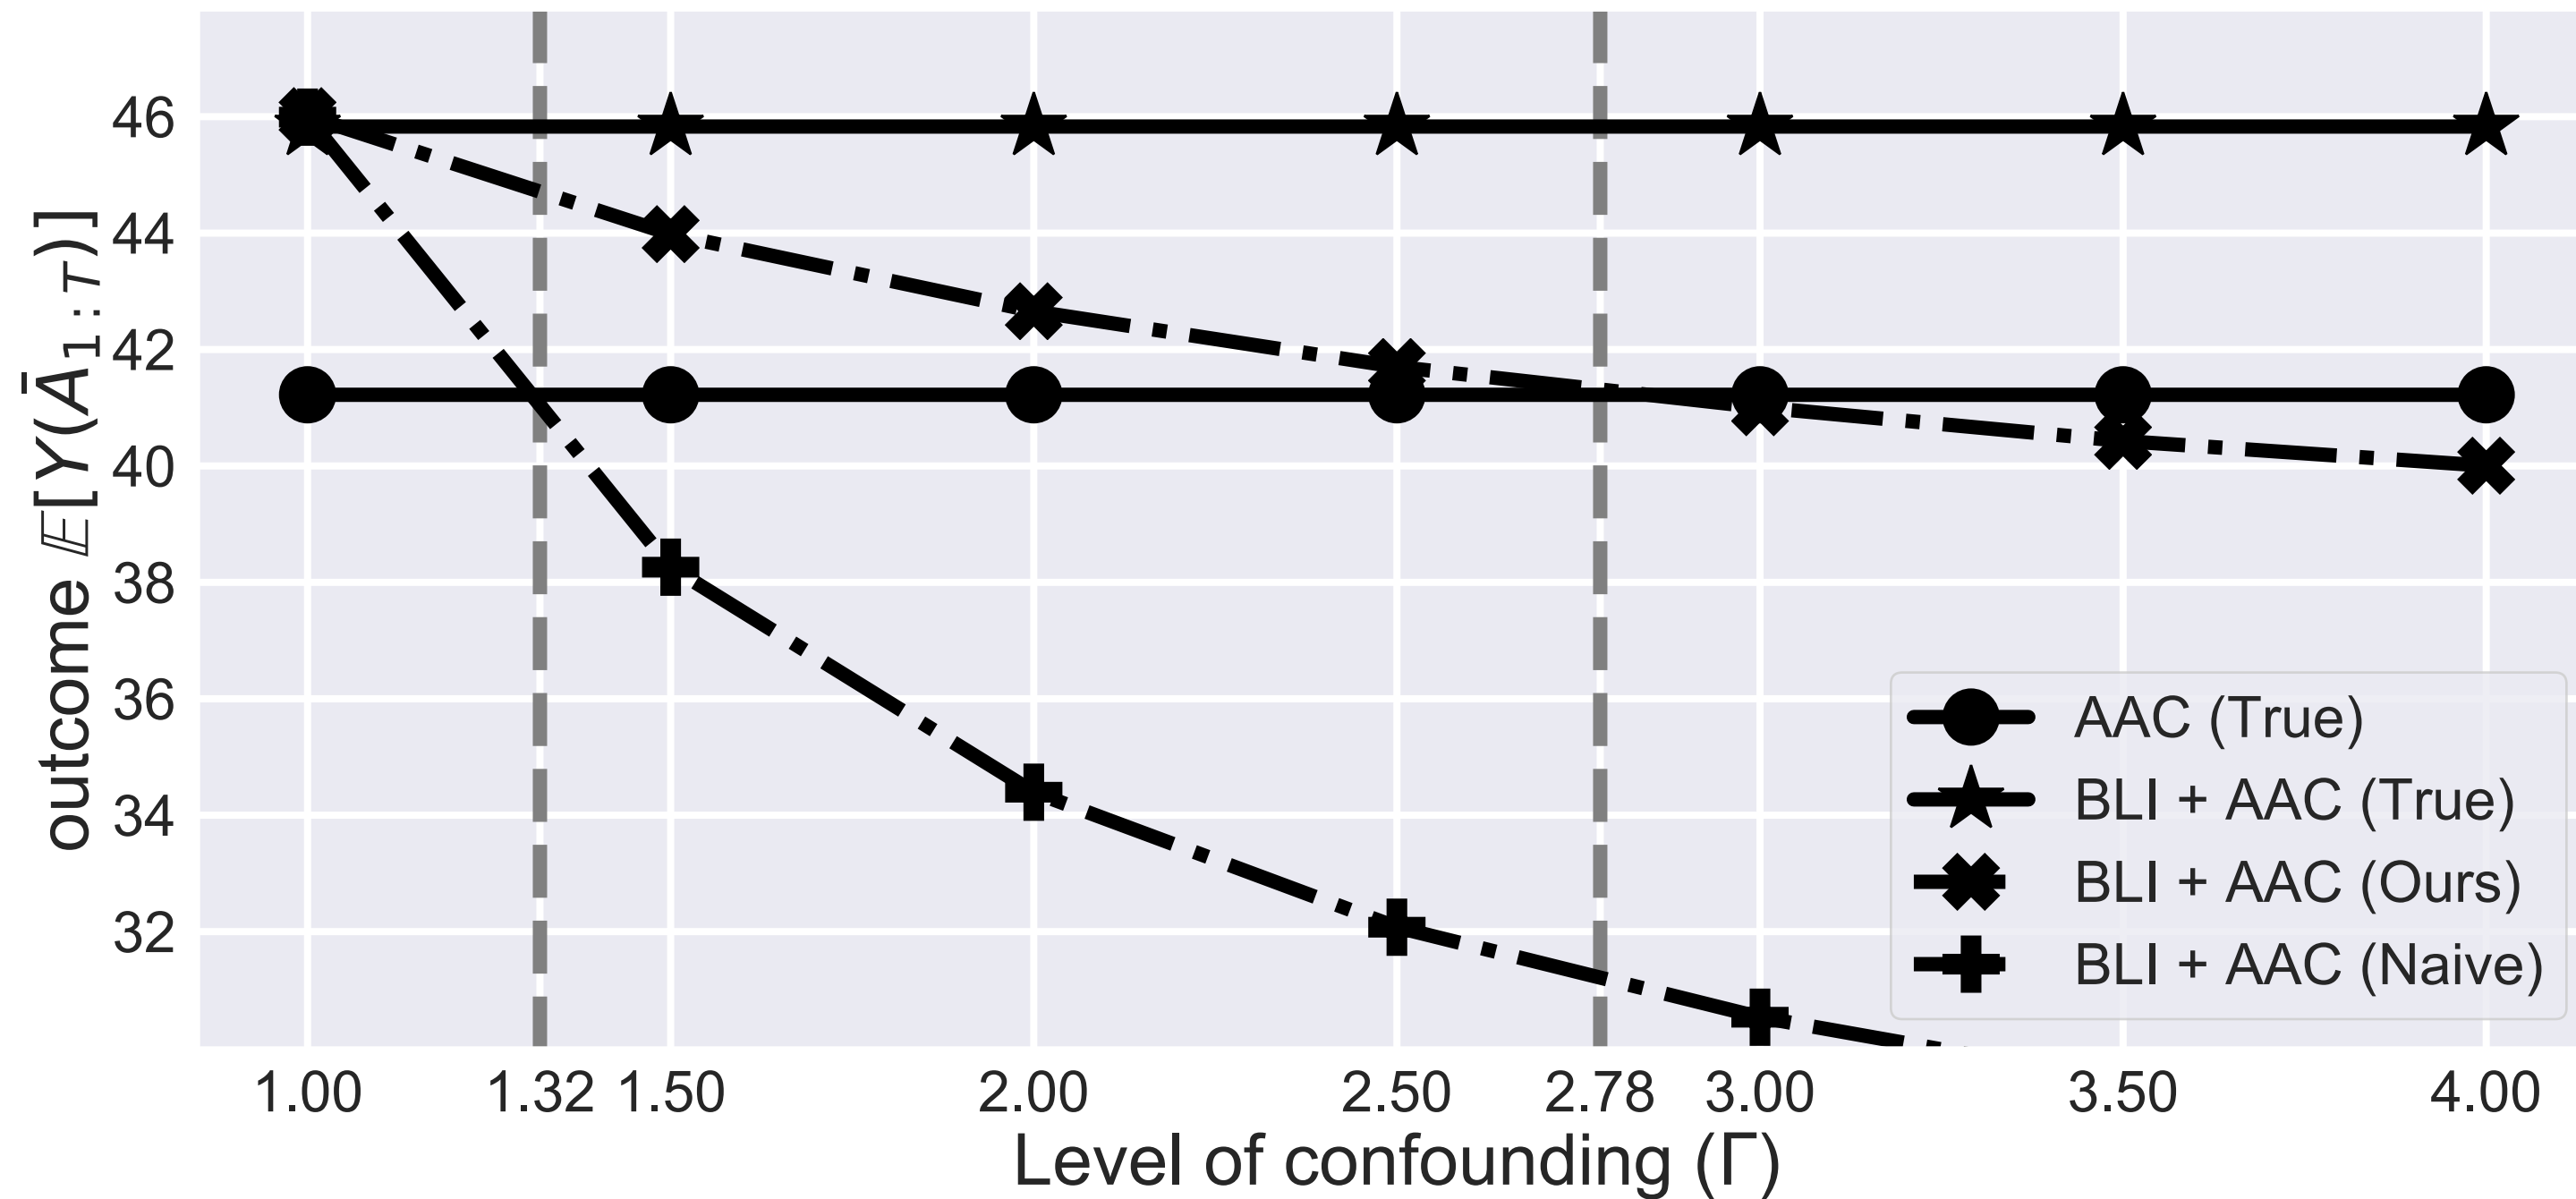

Supplement: Supplementary file [file da21bae82c02d1e2b8168d57cd3fbab7-Supplemental.zip]
